# Supplementary material for: Size-dependent fluorescence properties of [n]cycloparaphenylenes (n = 8–13), hoop-shaped π-conjugated molecules
Source: Royal Society of Chemistry journal article supplement (doi:10.1039/c2cp42712e), 2012-01-01
Supplement: c2cp42712e.pdf [file c2cp42712e.pdf]

Electronic Supplementary Information:

## Size-Dependent Fluorescence Properties of [*n*]Cycloparaphenylenes (*n* = 8 - 13), Hoop-Shaped $\pi$ -Conjugated Molecules

Mamoru Fujitsuka, Dae Won Cho, Takahiro Iwamoto, Shigeru Yamago, and Tetsuro Majima\*

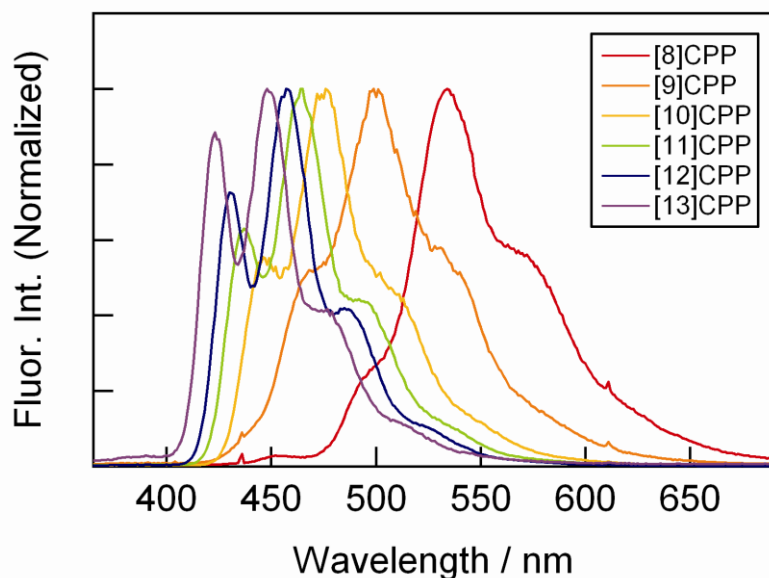

**Fig. S1.** Fluorescence spectra of [*n*]CPPs in 2-methyltetrahydrofuran at 77 K. The samples were excited at 350 nm.

**Table S1.** Fluorescence peaks ( $\lambda_{fl}$ ) and lifetime ( $\tau_{fl}$ ) of [*n*]CPPs in 2-methyltetrahydrofuran at 77 K.

| <i>n</i> | $\lambda_{fl}$ / nm <sup>a</sup> | $\tau_{fl}$ / ns <sup>b</sup> |
|----------|----------------------------------|-------------------------------|
| 8        | 503(sh), 534, 562(sh)            | 20.4                          |
| 9        | 472(sh), 500, 531(sh)            | 14.1                          |
| 10       | 446, 476, 506(sh), ~544(sh)      | 7.8                           |
| 11       | 437, 465, 490(sh), ~529(sh)      | 4.7                           |
| 12       | 430, 458, 485, ~521(sh)          | 3.2                           |
| 13       | 423, 448, 474(sh), ~509(sh)      | 2.3                           |

<sup>a</sup> (sh) denotes a shoulder peak. <sup>b</sup> Excitation: 370 nm. Estimation error: <5%

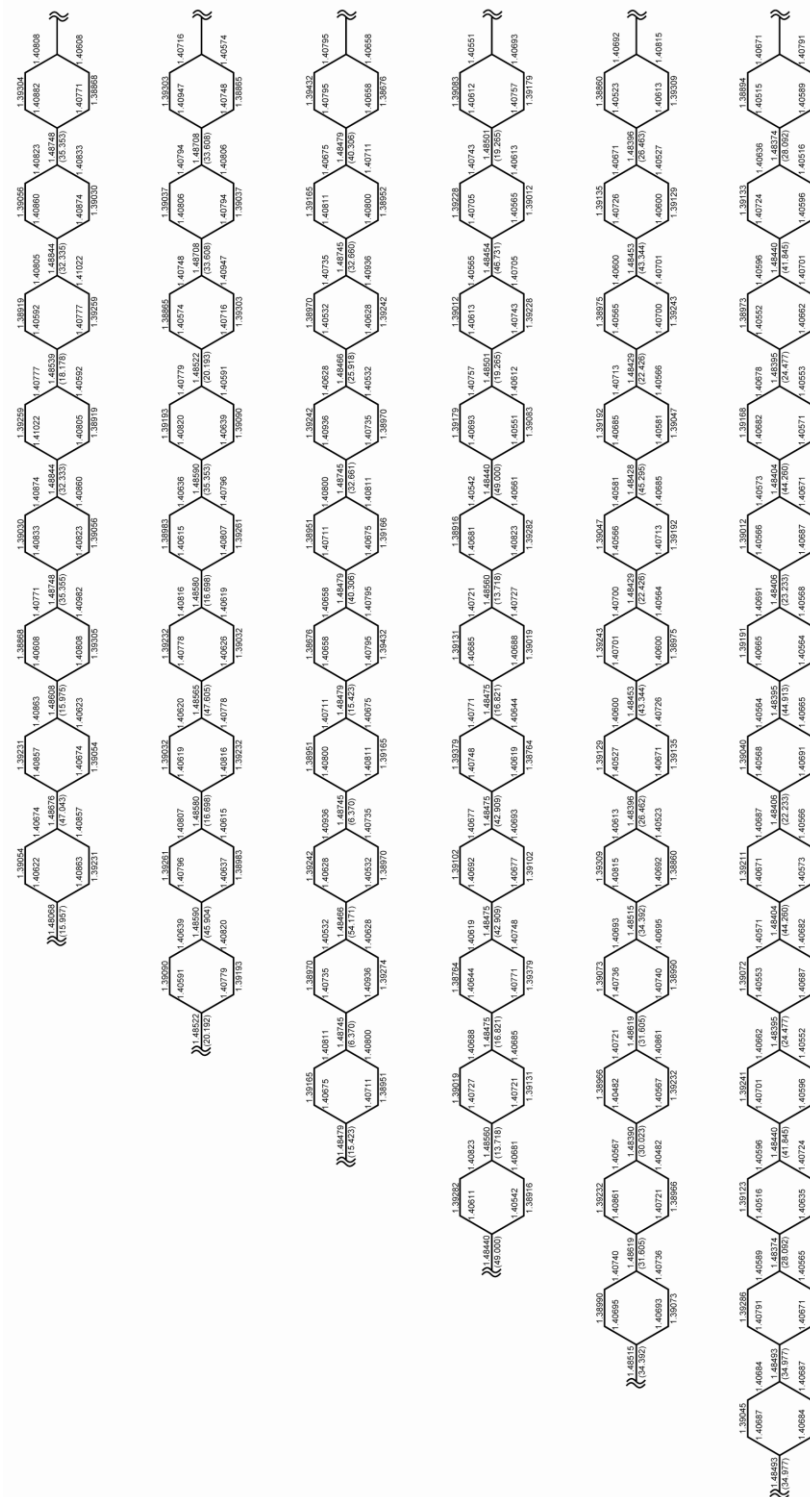

**Fig. S2.** Structures of CPPs in the ground state estimated by density functional theory at B3LYP/6-31G(d) level. Numbers indicate bond length. Numbers in parentheses are dihedral angle.

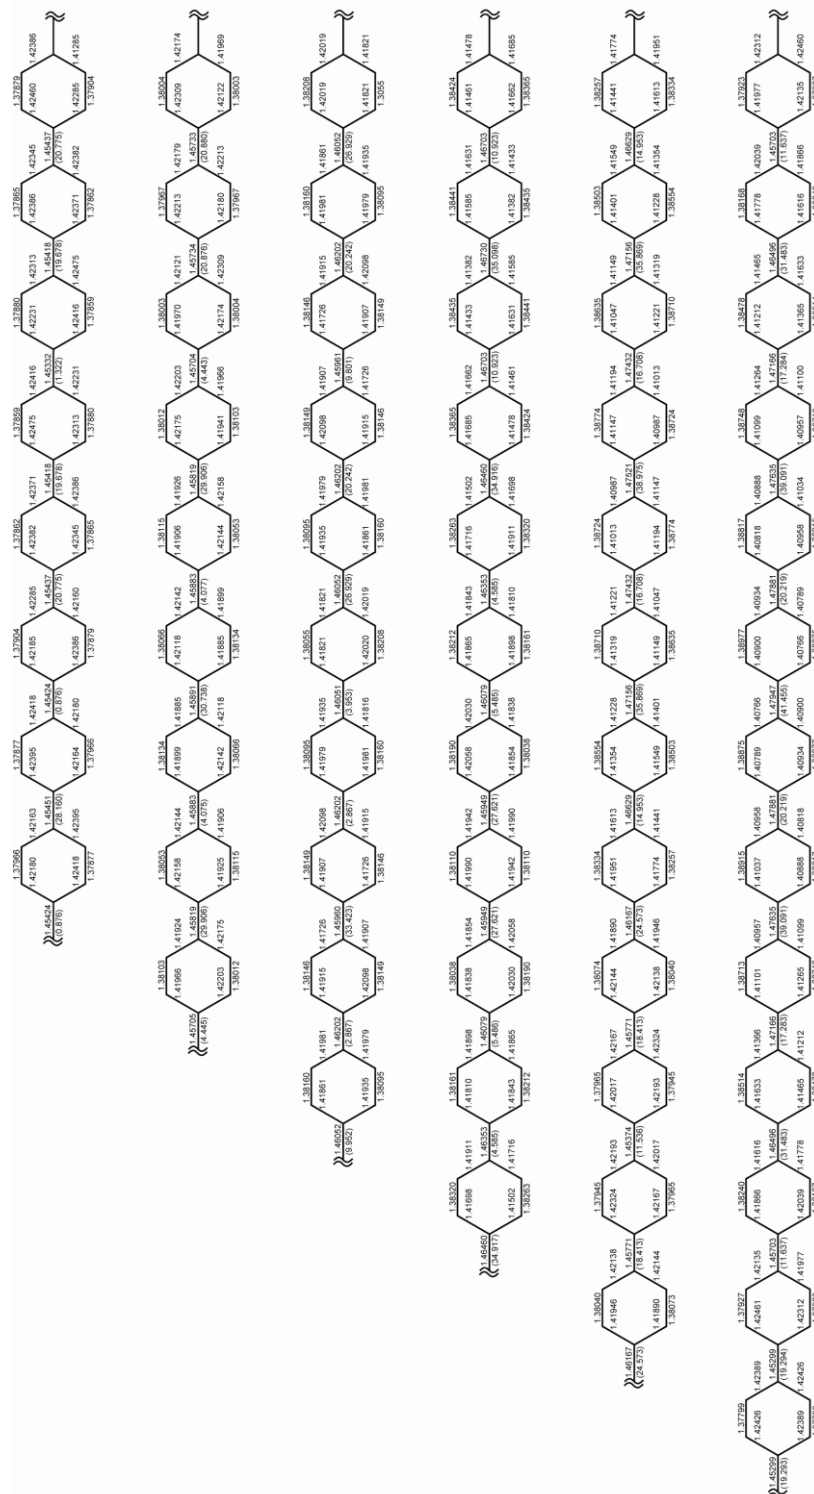

**Fig. S3.** Structures of CPPs in the  $S_1$  state estimated by density functional theory at B3LYP/6-31G(d) level. Numbers indicate bond length. Numbers in parentheses are dihedral angle.
